# Supplementary material for: Rapid dry exfoliation method for tuneable production of molybdenum disulphide quantum dots and large micron-dimension sheets
Source: Royal Society of Chemistry journal article supplement (doi:10.1039/c9nr04255e), 2019-01-01
Supplement: c9nr04255e1.pdf [file c9nr04255e1.pdf]

Supplementary Information

**Rapid Dry Exfoliation Method for Tunable Production of Molybdenum  
Disulphide Quantum Dots and Large Micron-Dimension Sheets**

Mustafa Ahmed, Heba Ahmed, Amgad R. Rezk, Leslie Y. Yeo

*Micro/Nanophysics Research Laboratory, RMIT University, Melbourne, VIC 3000, Australia*

*Email: [leslie.yeo@rmit.edu.au](mailto:leslie.yeo@rmit.edu.au)*

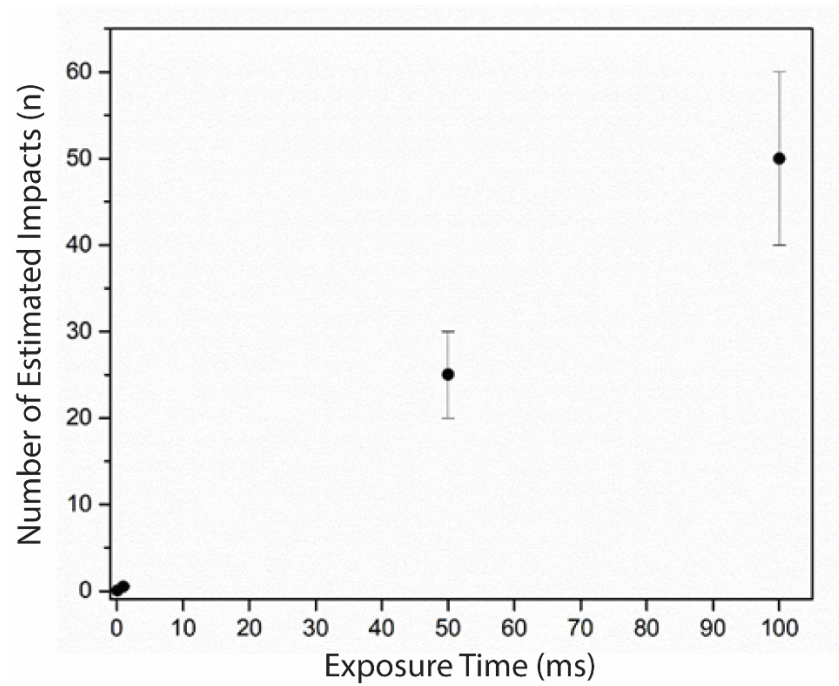

**Supplementary Fig. 1:** Typical particle cluster speeds upon impact, estimated from high speed videography, showing an average speed of 0.5 m/s.

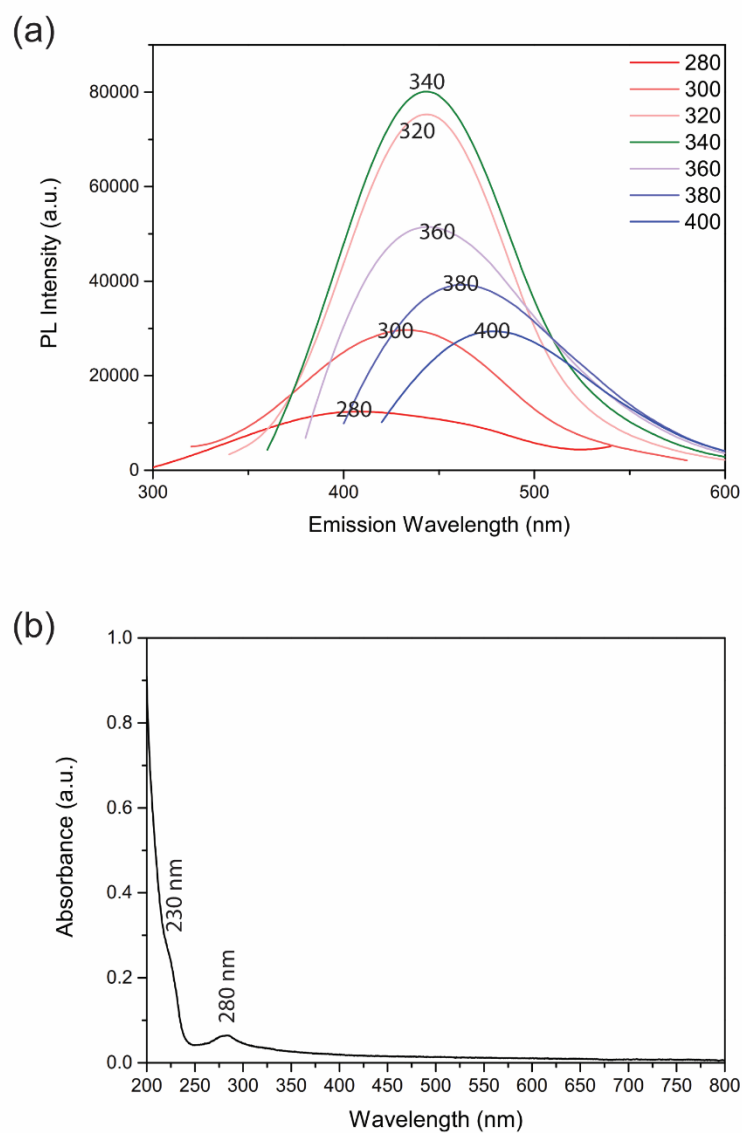

**Supplementary Fig. 2:** (a) PL spectrum of a dispersion of MoS<sub>2</sub> QDs irradiated at increasing wavelengths, in which a characteristic shift in the emission maxima is observed, thus indicating their polydispersed nature. (b) Absorbance spectrum of the MoS<sub>2</sub> QDs, showing characteristic peaks at 230 nm and 280 nm.

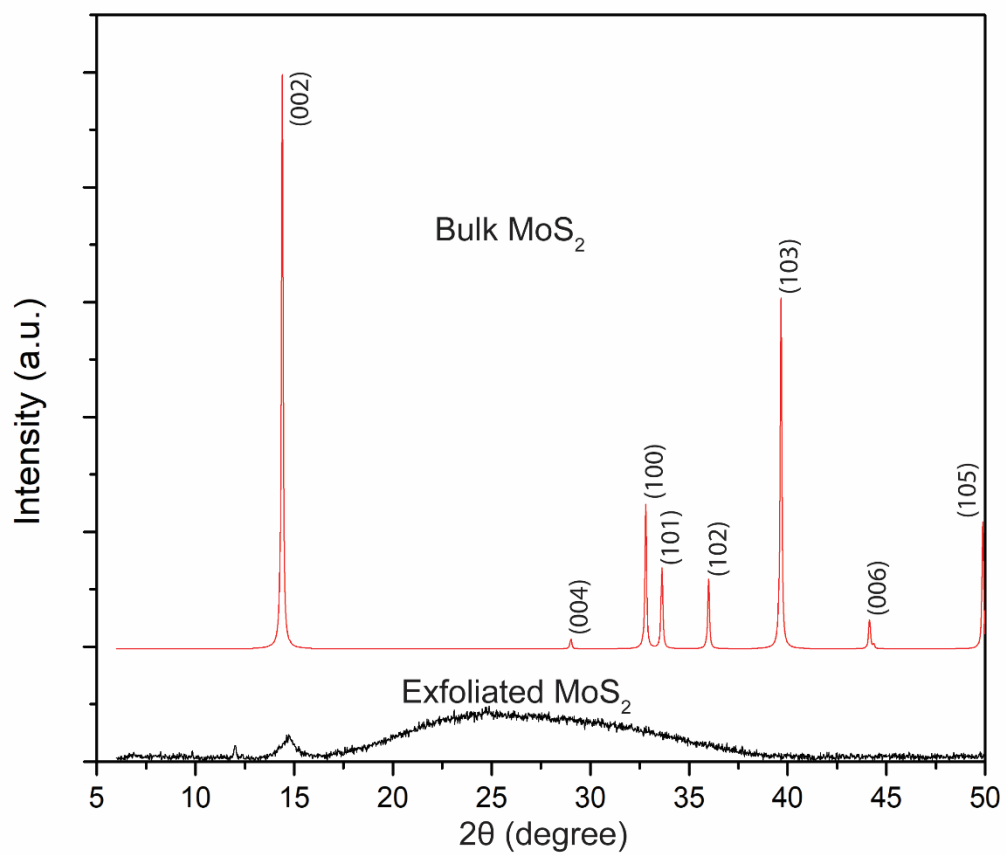

**Supplementary Fig. 3:** Powder XRD spectra of the exfoliated MoS<sub>2</sub> QDs in comparison to bulk MoS<sub>2</sub> on a glass substrate.

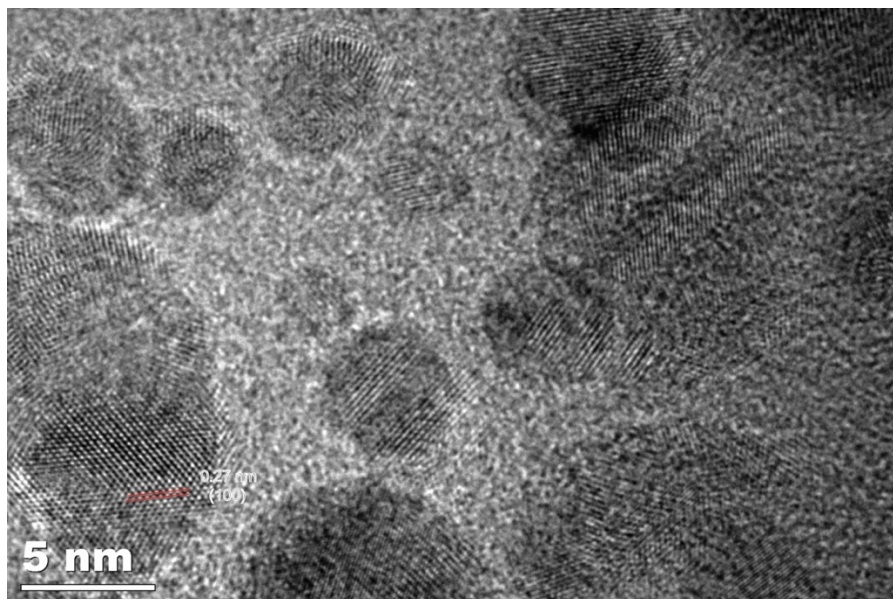

**Supplementary Fig. 4:** HR-TEM image of the MoS<sub>2</sub> QDs obtained, showing the characteristic 0.27 nm interlayer spacing of MoS<sub>2</sub> corresponding to the (100) lattice plane.

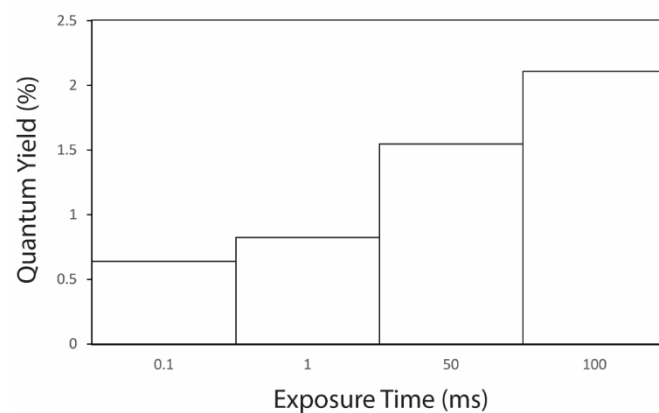

**Supplementary Fig. 5:** Increasing quantum yield, as calculated from the spectrofluorometric data, with increases in the SAW exposure time.

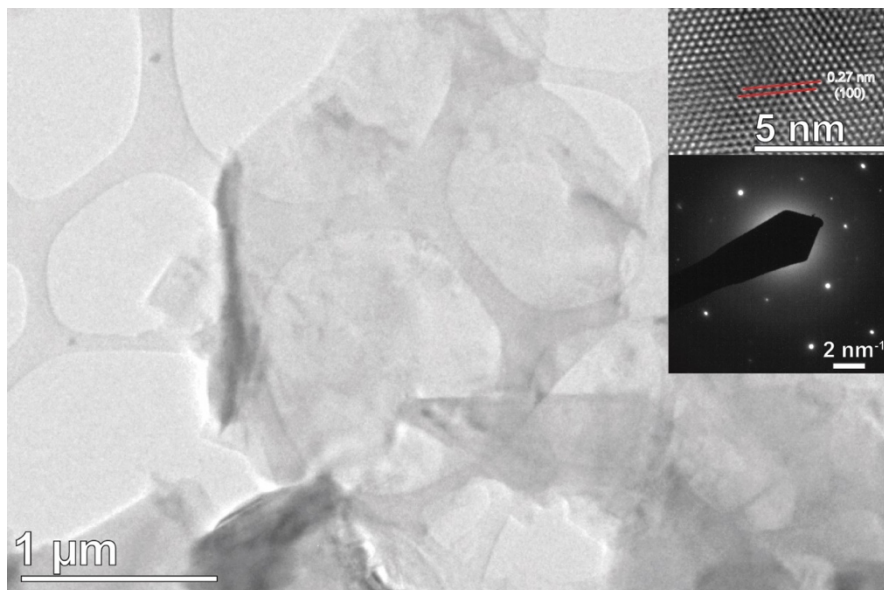

**Supplementary Fig. 6:** HR-TEM image of the large MoS<sub>2</sub> sheets that are produced. The insets show the characteristic 0.27 nm interlayer spacing of MoS<sub>2</sub> associated with the (100) plane together with the corresponding diffraction pattern.

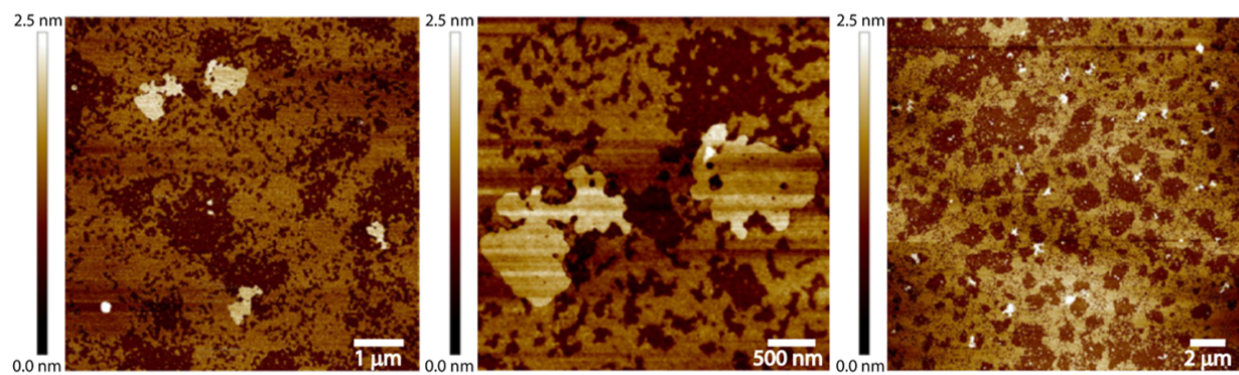

**Supplementary Fig. 7:** Representative AFM sample scans showing the large MoS<sub>2</sub> sheets obtained with the zero-limit height configuration.



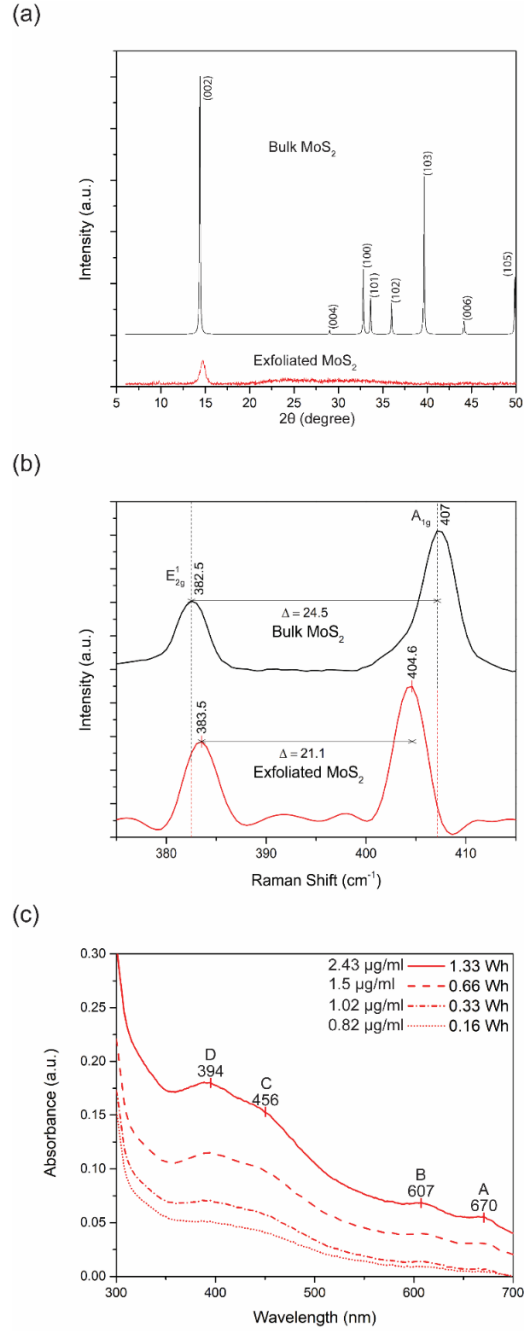

**Supplementary Fig. 8:** (a) XRD and (b) Raman spectra of the exfoliated sheets in comparison to bulk MoS<sub>2</sub>, and, (c) UV/Vis absorbance spectra of the former at different SAW energies together with the corresponding exfoliated product concentration (equivalent to a yield of 0.24%, 0.15%,

0.1% and 0.08% of the initial bulk material feedstock). A, B, C and D are the excitonic peaks, which can be seen to increase in intensity with increasing SAW exposure.
